# Supplementary material
Source: PubMed Central journal article supplement (PMC6018750)
Supplement: 41396_2018_75_MOESM3_ESM.pdf [file 41396_2018_75_MOESM3_ESM.pdf]

# a) Cluster Detection Pipeline

Microsynteny tree

Null models

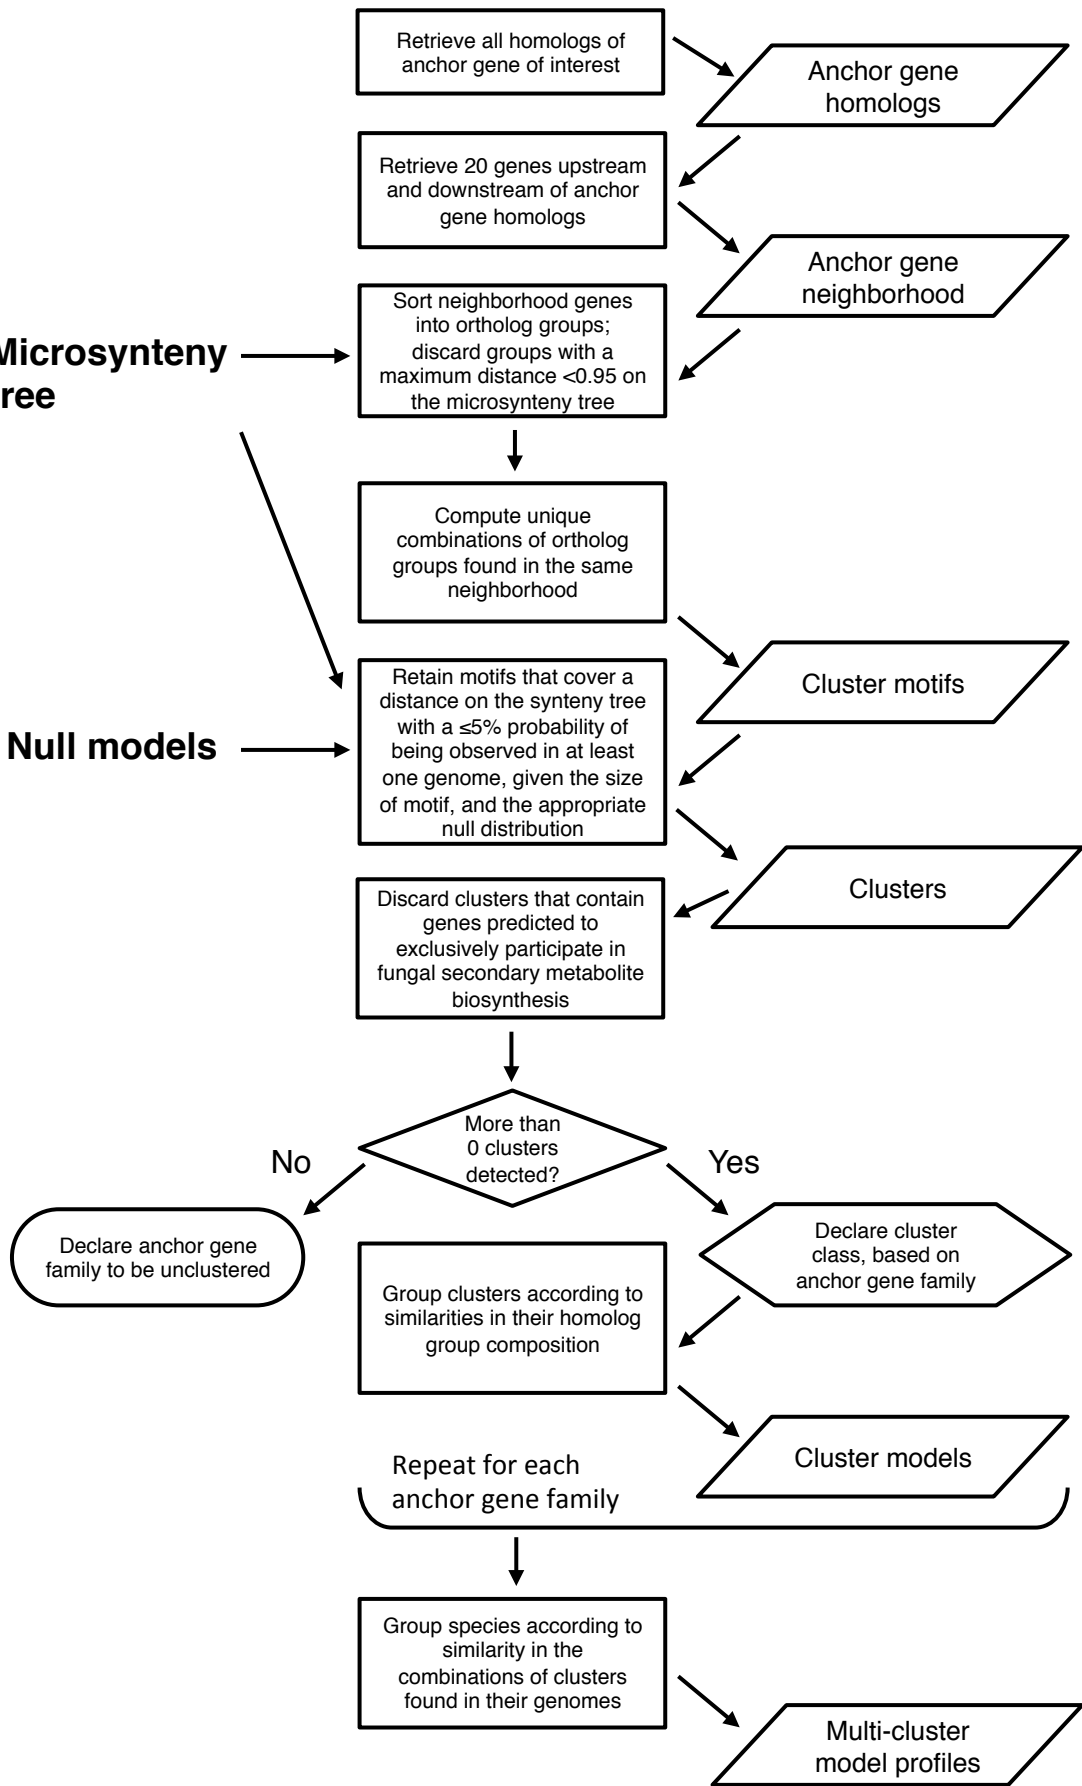

## b) *Microsynteny Tree Pipeline*

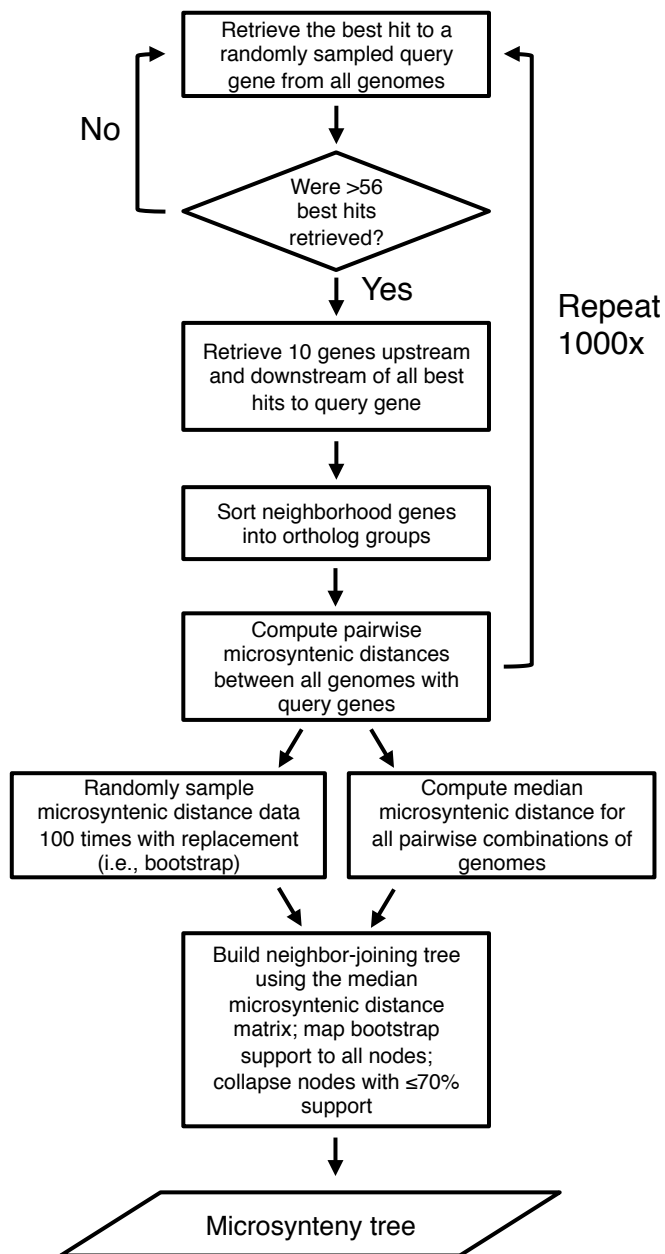

### c) Null Model Pipeline

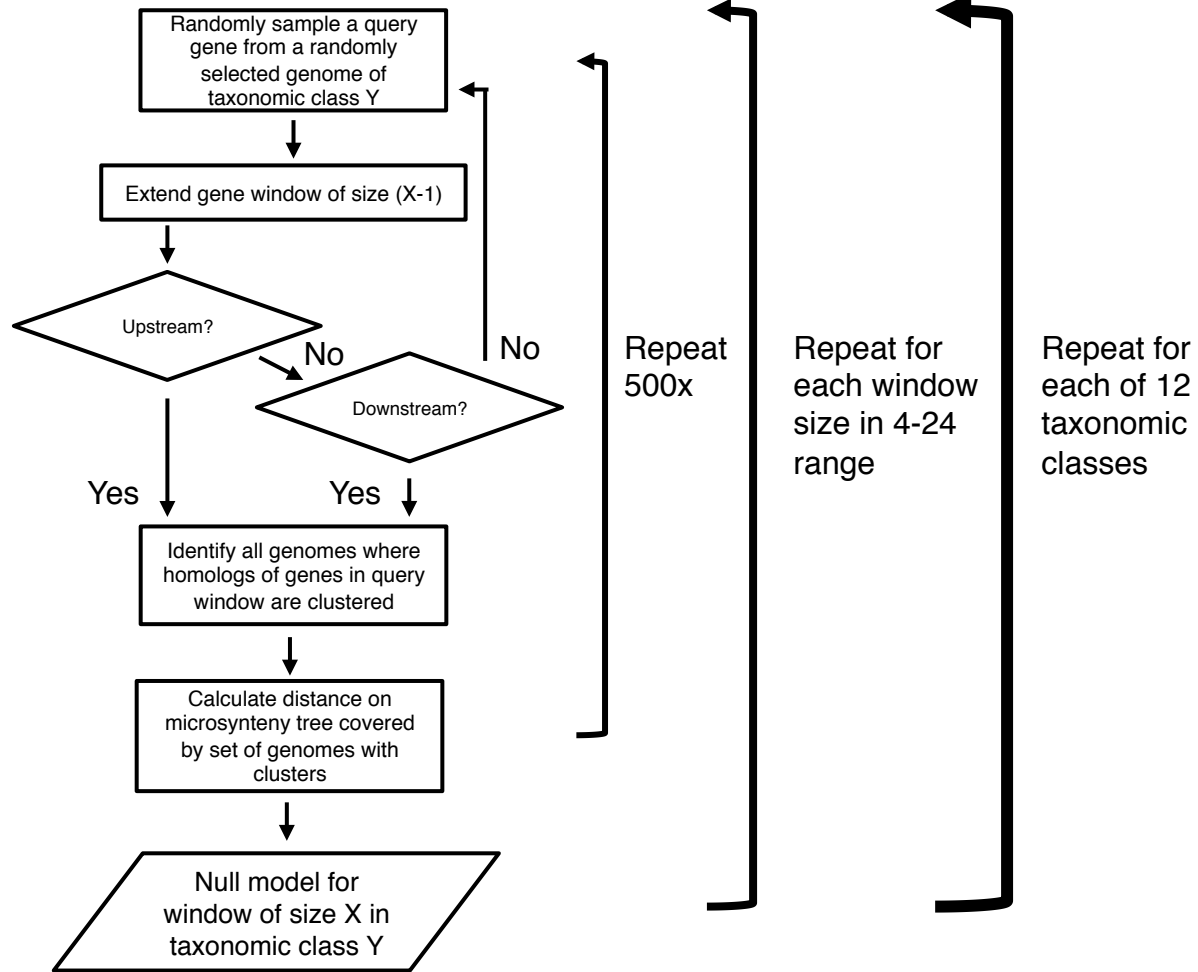

**d) Generalized contingency table for one tail Fisher's exact tests of enrichment**

|                                                                                                       | Number of (genomes/<br>species) associated<br>WITH ecological<br>lifestyle | Number of (genomes/<br>species) NOT<br>associated with<br>ecological lifestyle |
|-------------------------------------------------------------------------------------------------------|----------------------------------------------------------------------------|--------------------------------------------------------------------------------|
| Number of (genomes/<br>species) WITH (cluster/<br>cluster model/multi-<br>cluster model profile)      | <b>n11</b>                                                                 | <b>n12</b>                                                                     |
| Number of (genomes/<br>species) WITHOUT<br>(cluster/cluster model/<br>multi-cluster model<br>profile) | <b>n21</b>                                                                 | <b>n22</b>                                                                     |

Supplementary Figure 1: *Schematics of all computational pipelines and enrichment tests.* a) Description of the main cluster detection algorithm. b) Description of microsynteny tree pipeline. c) Description of null model pipeline. d) Generalized representation of the contingency tables used for all enrichment analyses.

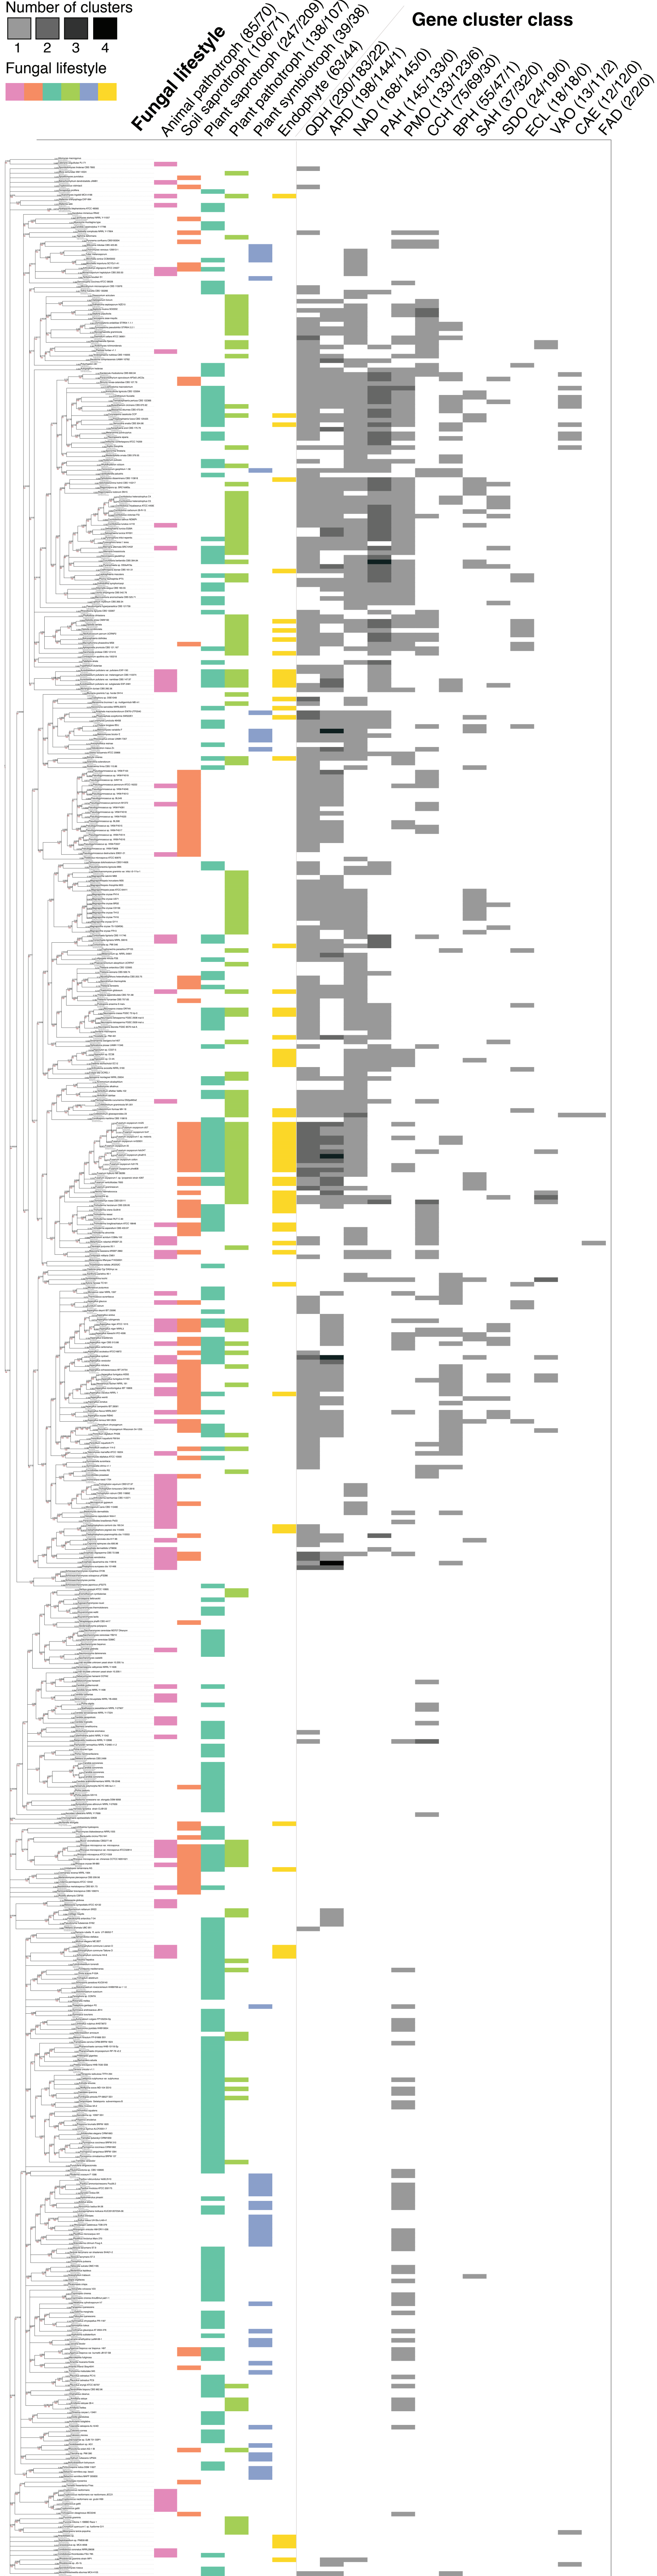

Supplementary Figure 2: The distribution of candidate phenylpropanoid-degrading gene clusters in fungi. The data shown in this figure are identical to those presented in Figure 1, except that the full species names of published fungal genomes are displayed on the microsynteny tree, along with their taxonomic order and class. Branch length distances (in black) and bootstrap support values (in red) are additionally displayed above their corresponding branches.

# Cluster class

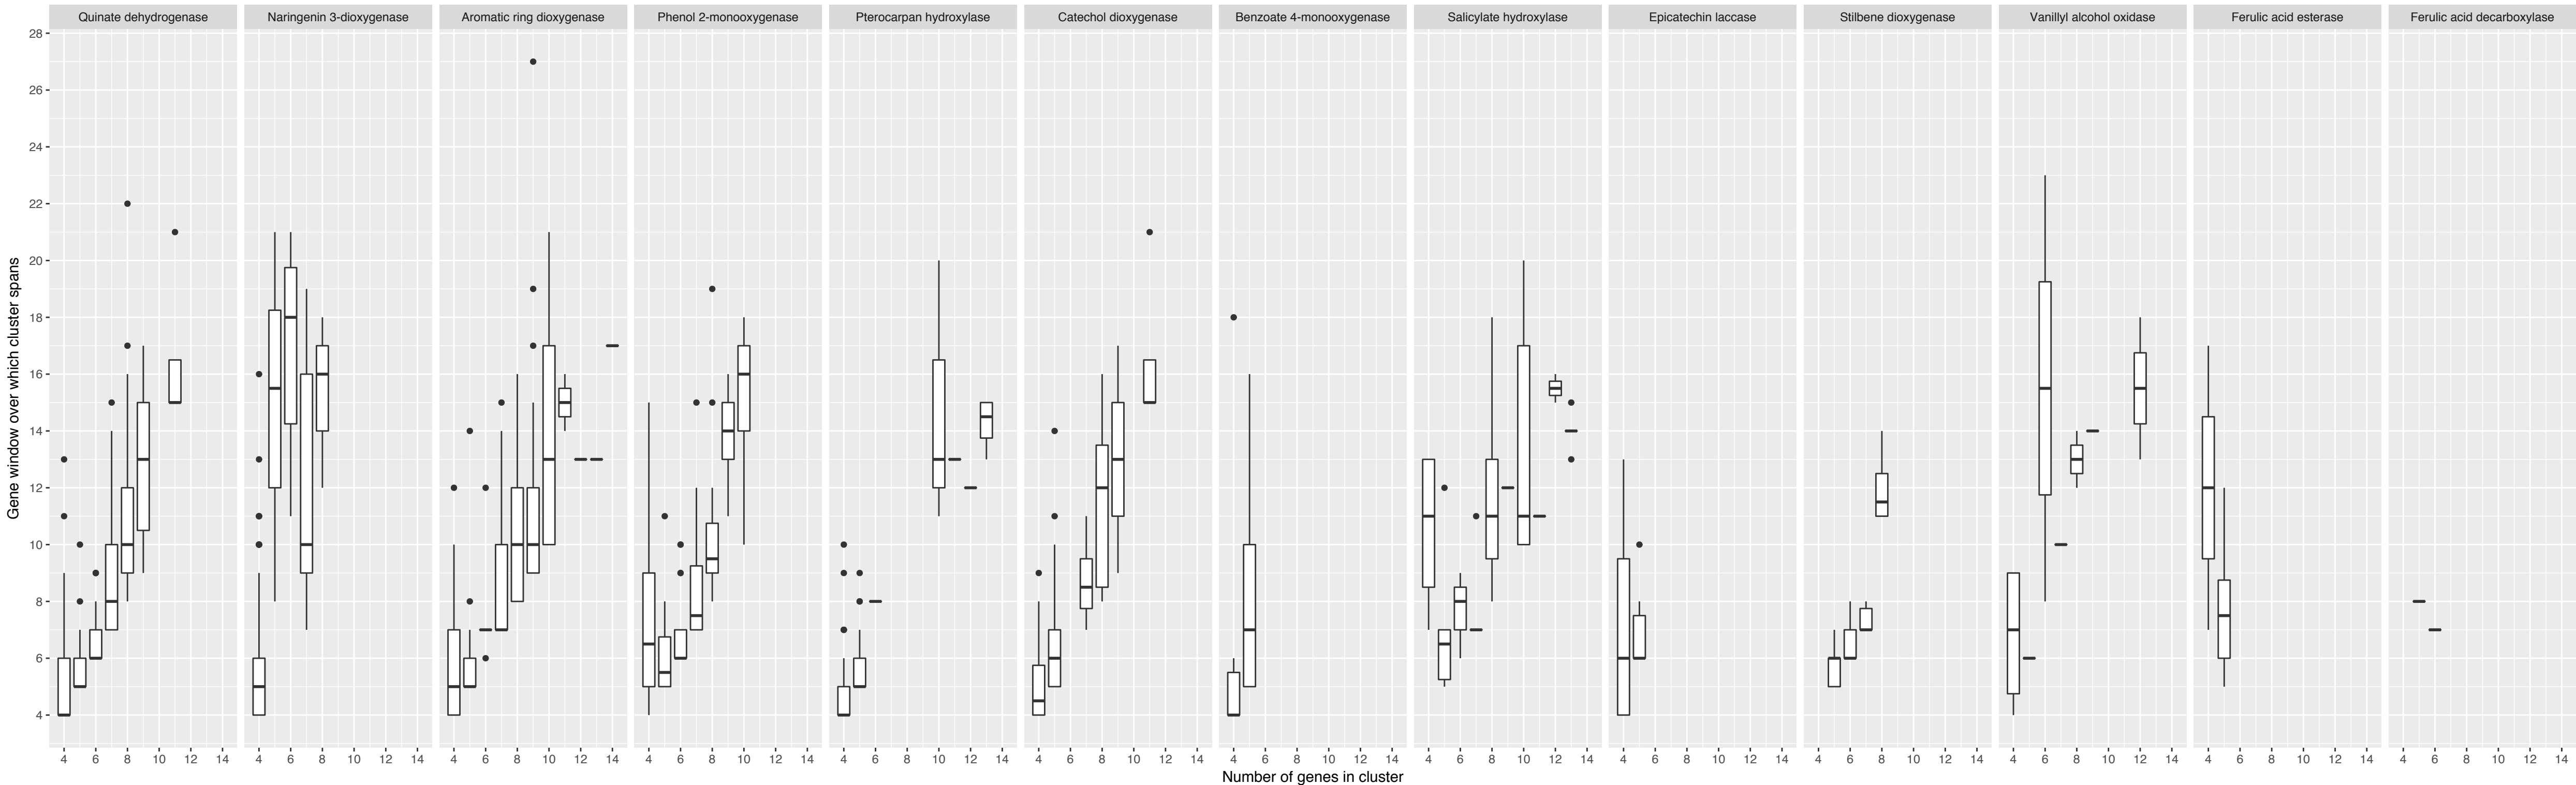

Supplementary Figure 3: *Distributions of gene window size for all gene cluster sizes.* The distributions of gene window size (i.e., the number of genes in the genomic region over which the gene cluster spans) for each gene cluster size in each cluster class are depicted as Tukey-style box-and-whisker plots, where the 25th, 50th, and 75th percentiles are represented by the lower, middle and upper hinges, respectively. Lower whiskers extend to the 25th percentile - 1.5 \* IQR, and upper whiskers extend to the 75th percentile + 1.5 \* IQR, where IQR is the interquartile range (defined as the distance between the 75th and 25th percentiles). Outliers (as determined by Tukey's method) are represented as black points that lie beyond the whisker boundaries. Not all gene cluster sizes are present in all cluster classes.

## Gene cluster class

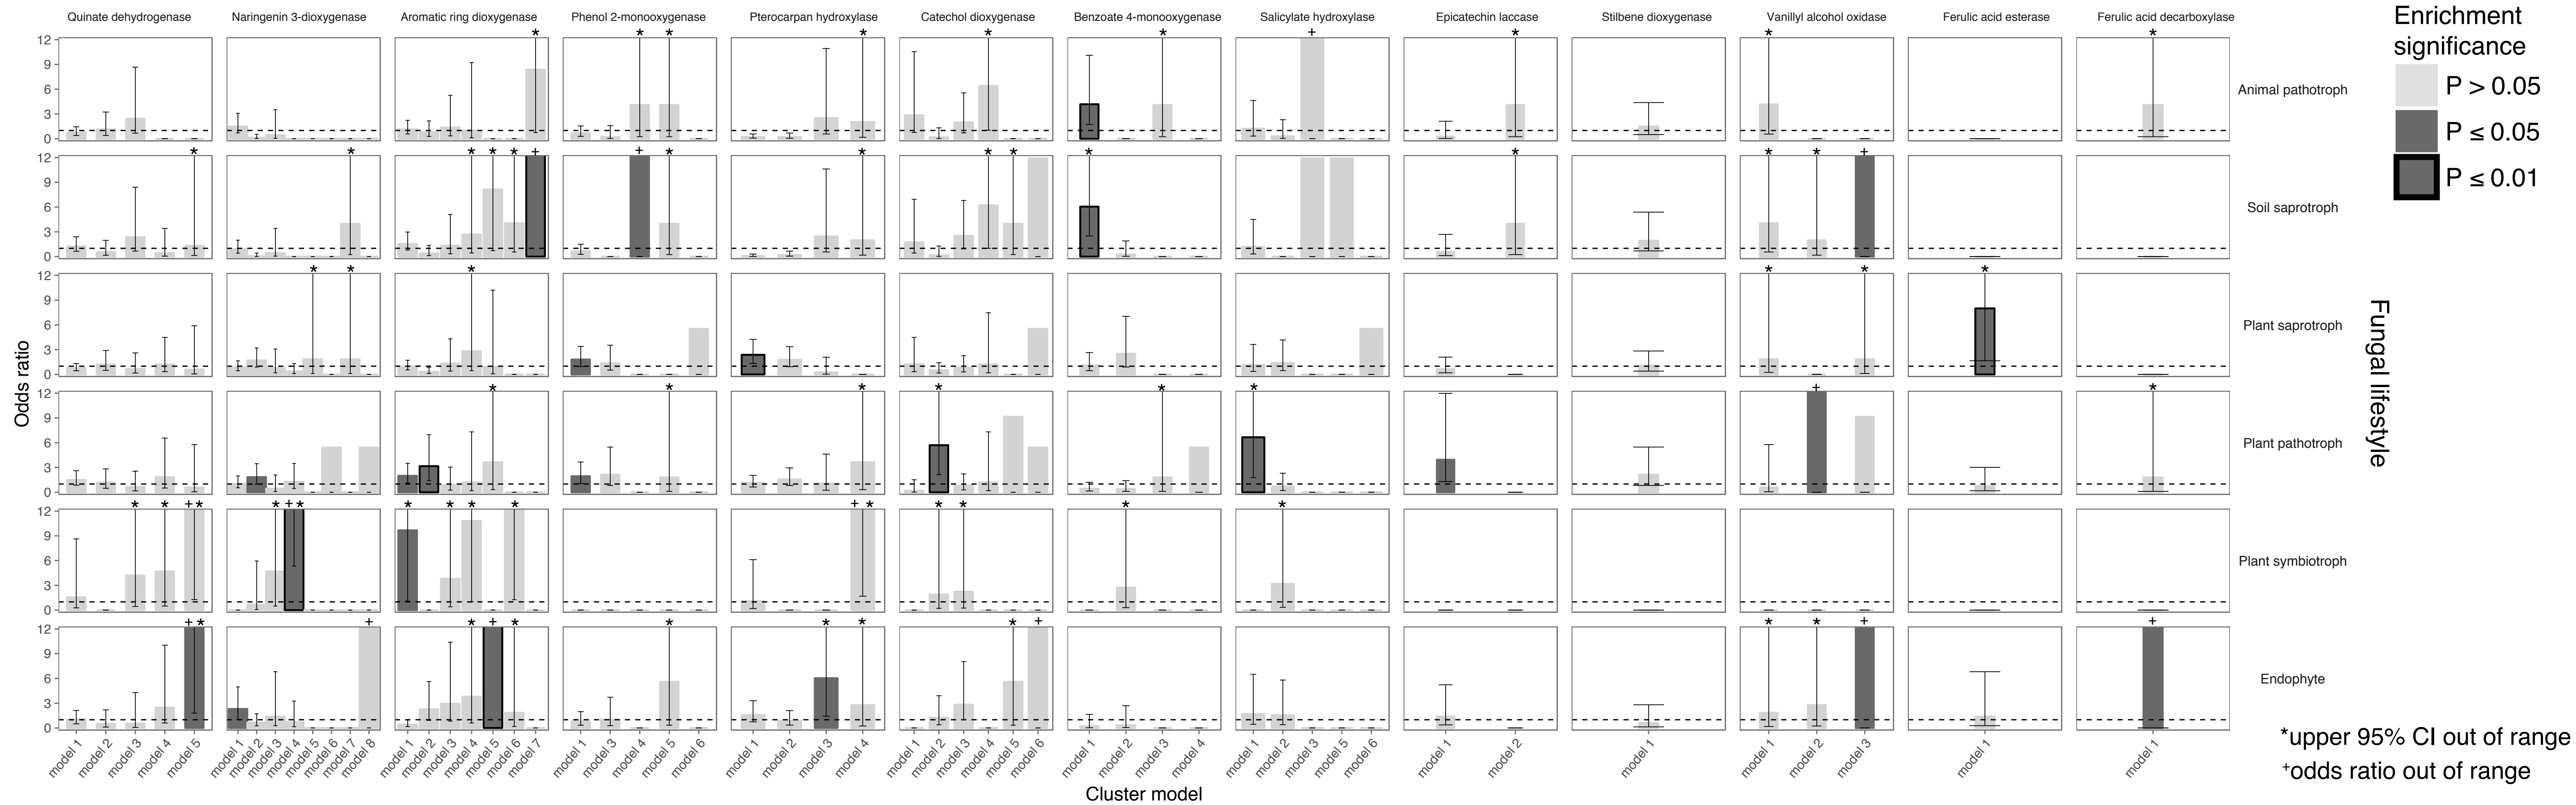

**Supplementary Figure 4: Associations between cluster model presence and fungal lifestyle.** Odds ratios representing the strength of the association between cluster model presence and ecological lifestyle are shown for all cluster models in all cluster classes, for each of 6 fungal ecological lifestyles, using data from Pezizomycotina species. Dark grey bars indicate enrichment below a significance level of 0.05, while black outlines indicate enrichment below a significance level of 0.01. Error bars indicate the 95% confidence interval (CI) for each odds ratio measurement. CIs of 0 are not shown.

Cluster model presence

Fungal lifestyle

Quinate dehydrogenase    Aromatic ring dioxygenase    Naringenin 3-dioxygenase    Pterocarpan hydroxylase    Phenol mono-oxygenase    Catechol dioxygenase    Benzoate 4-mono-oxygenase    Salicylate hydroxylase    Stilbene dioxygenase    Epicatechin lactase    Vanillyl alcohol oxidase    Ferulic acid esterase    Ferulic acid decarboxylase

animal\_pathotroph  
soil\_saprotroph  
plant\_saprotroph  
plant\_pathotroph  
plant\_symbiotroph  
endophyte

qdh\_model\_1  
qdh\_model\_2  
qdh\_model\_3  
qdh\_model\_4  
qdh\_model\_5  
qdh\_model\_6  
ard\_model\_1  
ard\_model\_2  
ard\_model\_3  
ard\_model\_4  
ard\_model\_5  
ard\_model\_6  
ard\_model\_7  
nad\_model\_1  
nad\_model\_2  
nad\_model\_3  
nad\_model\_4  
nad\_model\_5  
nad\_model\_6  
nad\_model\_7  
nad\_model\_8  
pah\_model\_1  
pah\_model\_2  
pah\_model\_3  
pah\_model\_4  
pmo\_model\_1  
pmo\_model\_2  
pmo\_model\_3  
pmo\_model\_4  
pmo\_model\_5  
pmo\_model\_6  
cch\_model\_1  
cch\_model\_2  
cch\_model\_3  
cch\_model\_4  
cch\_model\_5  
cch\_model\_6  
bph\_model\_1  
bph\_model\_2  
bph\_model\_3  
bph\_model\_4  
sah\_model\_1  
sah\_model\_2  
sah\_model\_3  
sah\_model\_4  
sah\_model\_5  
sah\_model\_6  
sdo\_model\_1  
ecl\_model\_1  
ecl\_model\_2  
vac\_model\_1  
vac\_model\_2  
vac\_model\_3  
cae\_model\_1  
cae\_model\_2  
fad\_model\_1

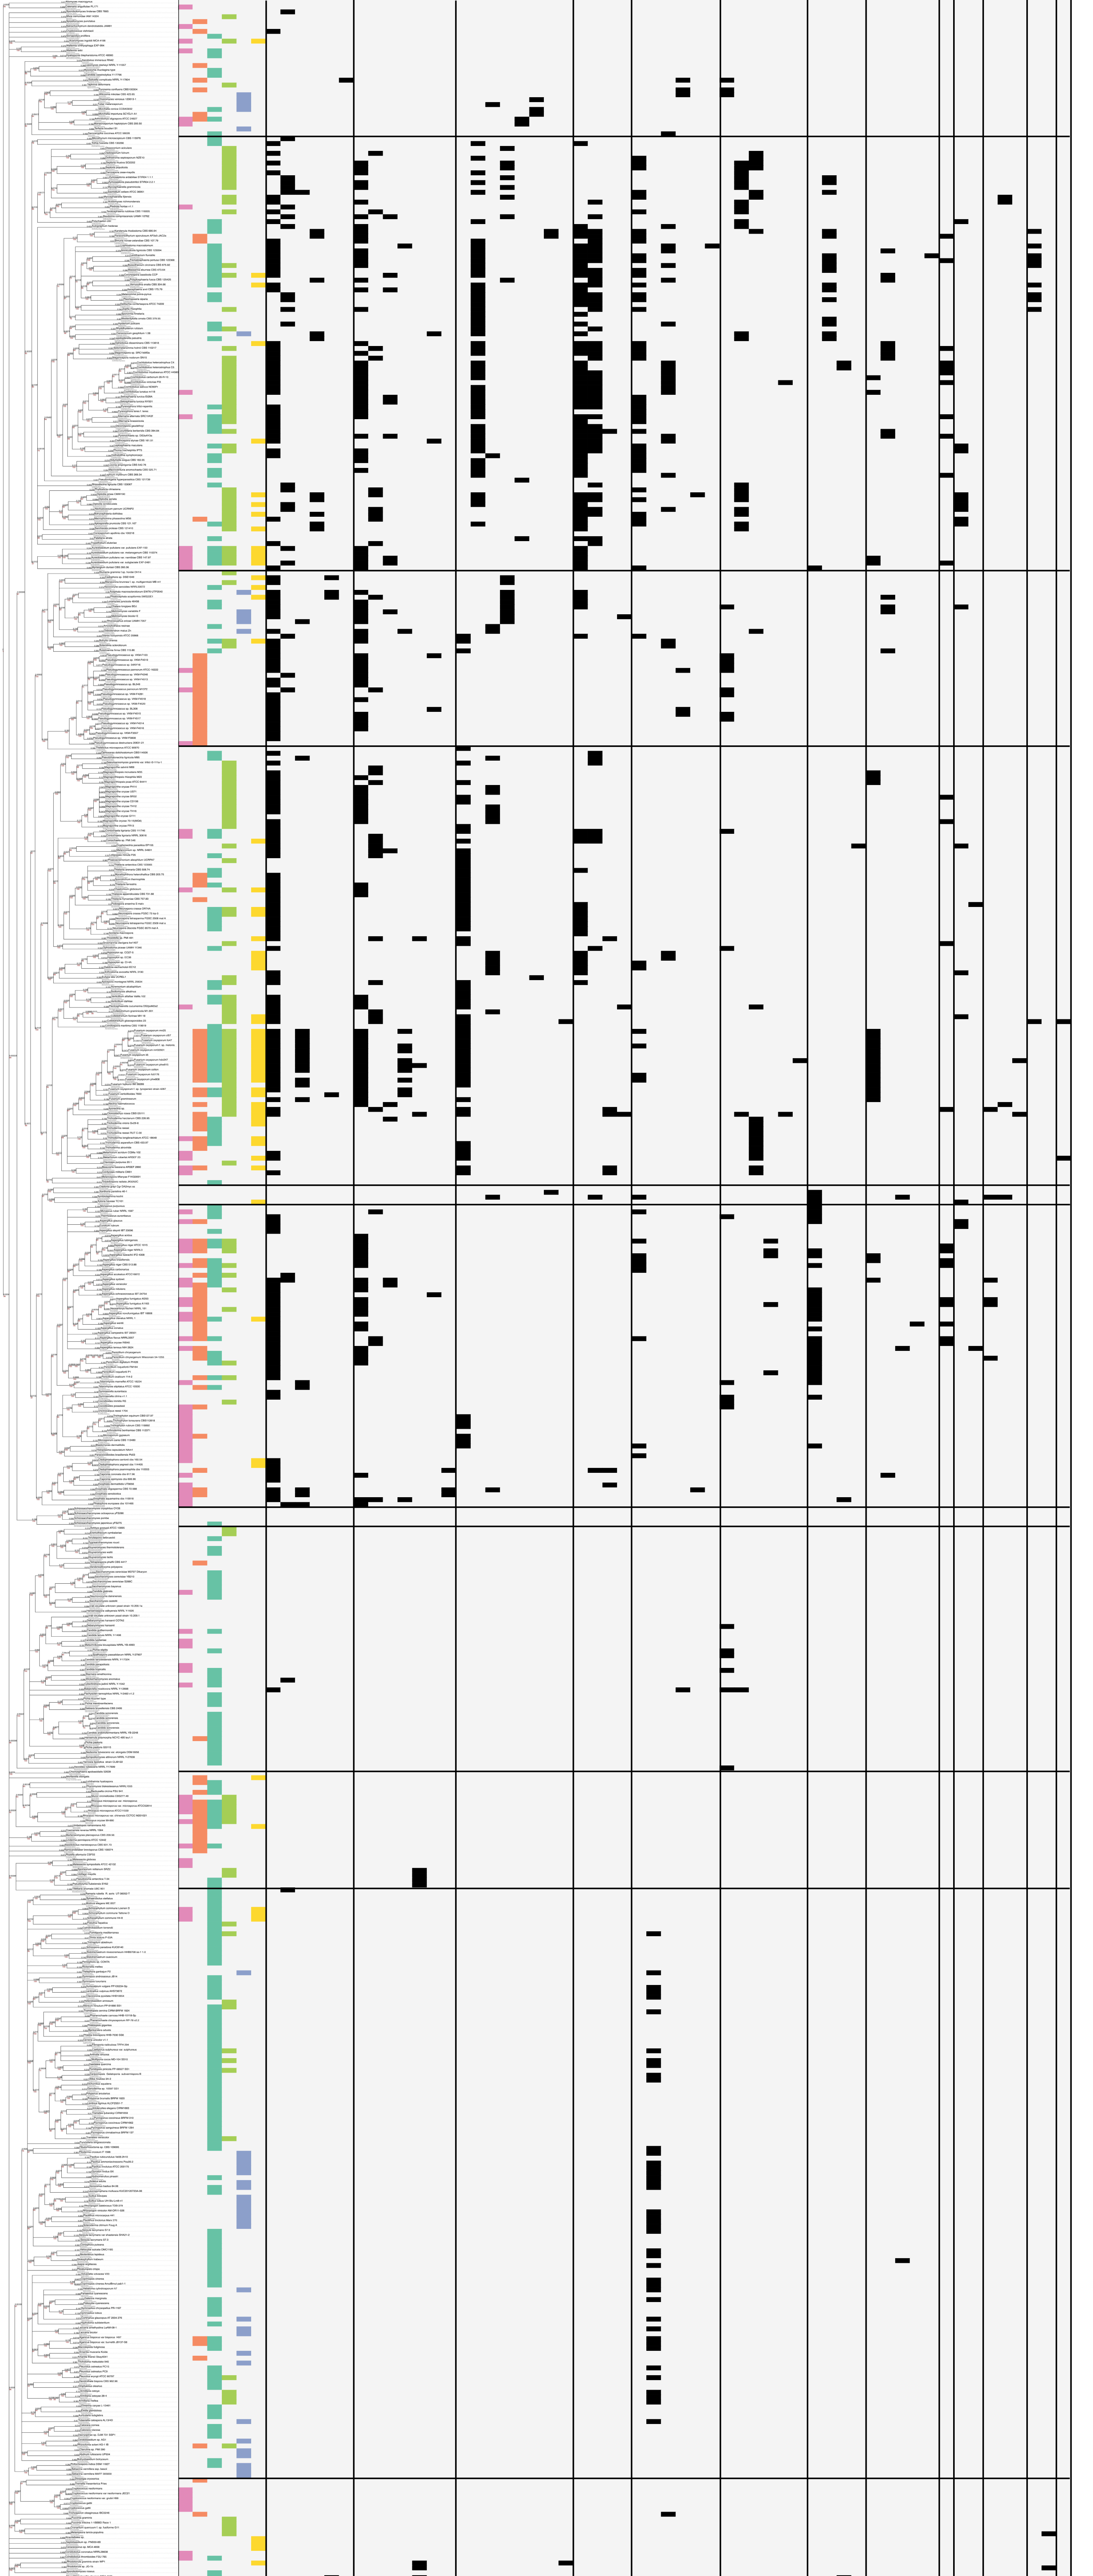

Supplementary Figure 5: The distribution of candidate phenylpropanoid-degrading gene cluster models in fungi. Displayed on the left is the microsynteny species tree containing all 529 genomes used in this study. Taxonomic order and class names are indicated below species names. Branch length distances (in black) and bootstrap support values (in red) are displayed above their corresponding branches. To the right are heatmaps displaying the ecological lifestyles associated with each genome (color coded by lifestyle) and the presence/absence of all 56 unique cluster types (cluster models) detected in each genome. The 6 largest taxonomic classes are additionally indicated to the right of the heatmaps.
